# Supplementary material for: Dual-sensitive GO-based self-assembly for the delivery of a hydrophobic anti-cancer drug
Source: Royal Society of Chemistry journal article supplement (doi:10.1039/d2nj03594d), 2022-01-01
Supplement: d2nj03594d1.pdf [file d2nj03594d1.pdf]

## Supporting Information

### Dual-Sensitive GO-Based Self-Assembly for Delivery of Hydrophobic Anti-Cancer Drug

Jiaqi Ma, Yehong Liu, Miaoxin Chen, Mengli Li, Shouhong Xu\*, Honglai Liu

*State Key Laboratory of Chemical Engineering and School of Chemistry & Molecular Engineering, East China University of Science and Technology, Shanghai, 200237, P.R. China*

\*Corresponding author E-mail: [xushouhong@ecust.edu.cn](mailto:xushouhong@ecust.edu.cn)

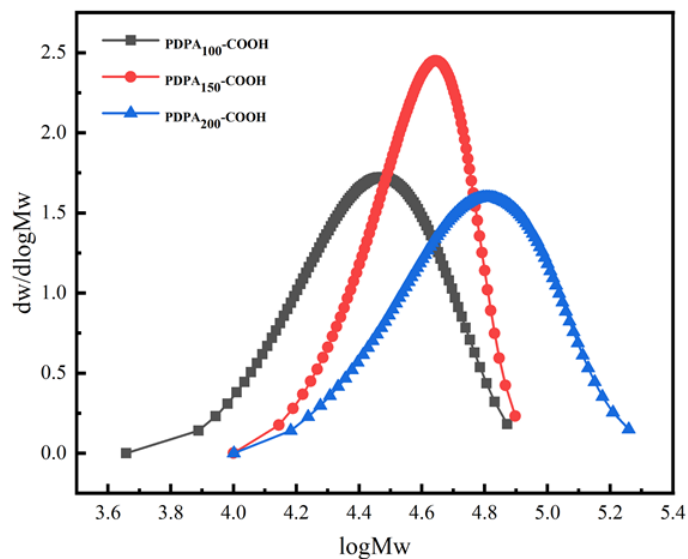

**Fig. S1. The GPC curve of PDPA<sub>n</sub>-COOH (n=100, 150, 200)**

Fig. S1 was the gel permeation chromatogram (GPC) of PDPA<sub>n</sub>-COOH, the products were mainly synthesized by adjusting the molar ratio between DPA monomer and 4-(1-bromoethyl)benzoic acid initiator. There was a certain deviation between the actual molecular weight of the product and the charging ratio, but the result of molecular weight had a great correlation with the charging ratio. For example, in this chapter, the feeding ratios of monomer and initiator were 100:1, 150:1, 200:1, respectively. In fact, the molecular weights of the synthesized PDPA<sub>n</sub>-COOH polymers were 23628, 36700, 48620, respectively, and the corresponding degrees of polymerization were 110, 170, 226.

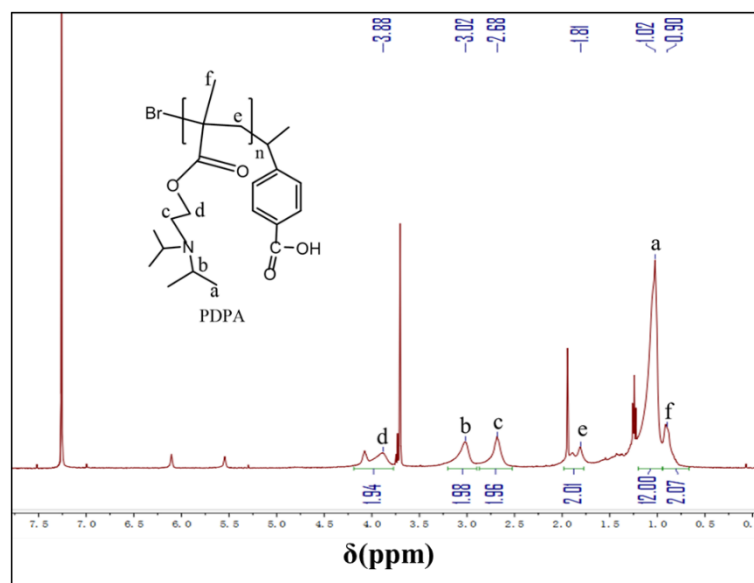

**Fig. S2. The <sup>1</sup>H NMR of PDPA-COOH**

As shown in Fig. S2, it could be found the peaks of 0.90 ppm (s, -CCH<sub>3</sub>), 1.02 ppm (s, -C(CH<sub>3</sub>)<sub>2</sub>), 1.81 ppm (dt, -CH<sub>2</sub>-), 2.43-2.81 ppm (m, -N-CH<sub>2</sub>-), 2.82-3.18 ppm (m, -N-CH-), 3.68-4.05 ppm (m, -O-CH<sub>2</sub>-), and the peak area conformed to the ratio of a : b : c : d : e : f = 12 : 2 : 2 : 2 : 2 : 3, which indicated PDPA-COOH was formed.

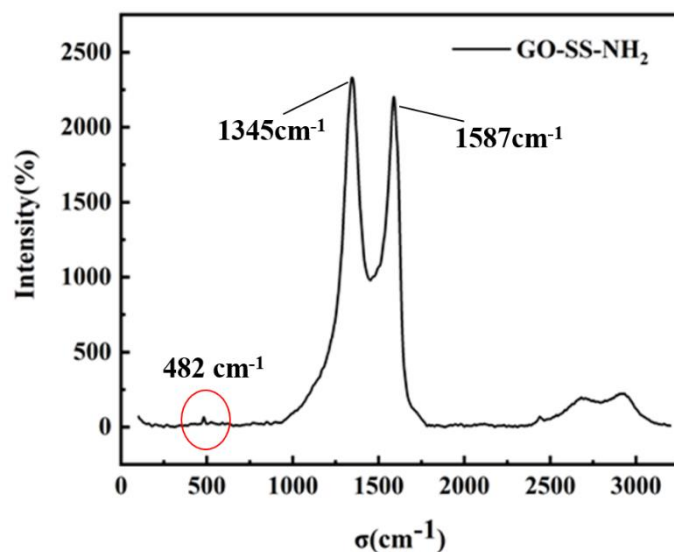

**Fig. S3. The Raman spectrum of GO-SS-NH<sub>2</sub>**

The two strong characteristic peaks (Fig. S3) located at 1345 and 1587 cm<sup>-1</sup> corresponded to the D peak (Disorder Peak) and the G peak (Graphitic Peak) of GO, respectively. The D peak was due to the defect sites in the GO structure and the sp<sup>3</sup> vibration of disordered carbon atoms, reflecting the disordered state between the graphite sheets. The G peak was the sp<sup>2</sup> characteristic peak of carbon atom, which reflected the symmetry and crystallinity of GO. The small peak at 482 cm<sup>-1</sup> belonged to the Raman characteristic peak of disulfide bond.

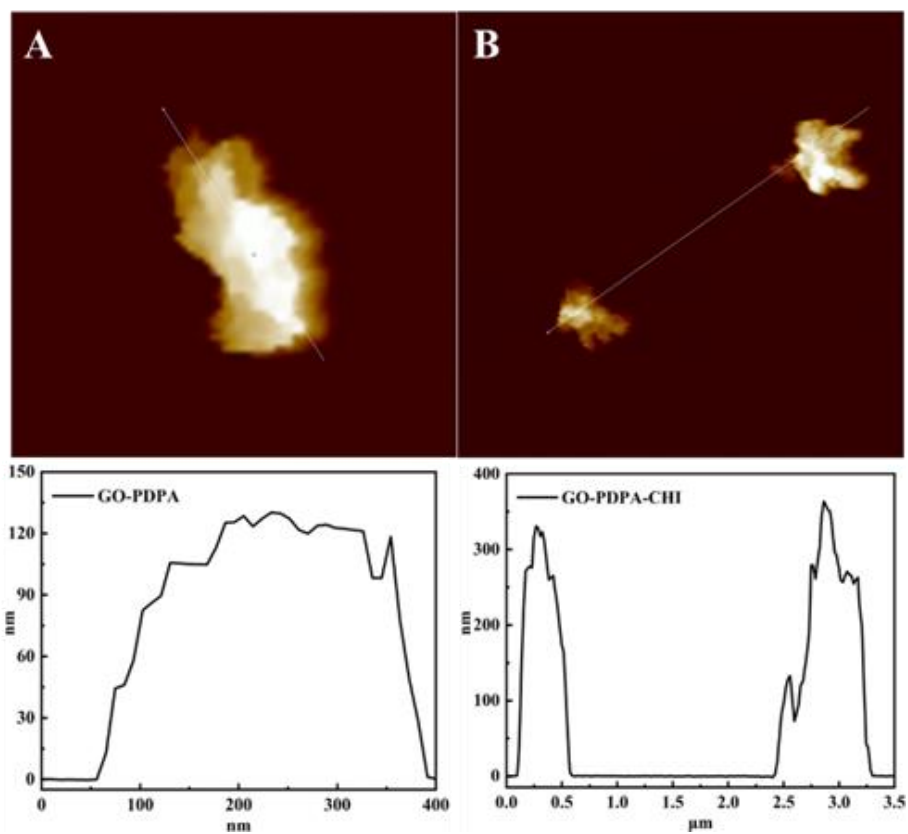

**Fig. S4. The AFM images of GO-PDPA (A) and GO-PDPA-CHI (B)**

Fig. S4 showed the thickness of GO-PDPA and GO-PDPA-CHI, which were nearly 120 nm and 300 nm, respectively. The thickness was found to increase due to the modification of PDPA and CHI on the surface of GO.
